# Supplementary material for: A Study of Heavy Flavored Mesons with Killingbeck Potential Approach *
Source: Research Square preprint supplement (doi:10.21203/rs.3.rs-6936591/v1), 2025-07-02
Supplement: Supplementary file 1 [file 8cf8d24907ce43c6a03c84b7.pdf]

# A Study of Heavy Flavored Mesons with Killingbeck Potential Approach\*

Pritom Kumar Nath,<sup>†</sup> Rishan Dev Choudhury,<sup>‡</sup> and Jugal Lahkar<sup>§</sup>

*Tezpur University, Napaam, Tezpur (Assam)*

*Pin: 784028*

(Dated: June 20, 2025)

In non-perturbative Quantum Chromodynamics (QCD), the formalism of the potential model has proven effective in predicting various static and dynamic properties of heavy-flavored mesons. Within the Schrödinger's framework, the interaction potential plays a crucial role in determining the meson spectrum. In this work, we incorporate the Killingbeck potential in the Hamiltonian and apply the quantum mechanical variational method to estimate the masses, decay constants, and oscillation frequencies of selected heavy-flavored mesons, using a Coulombic wave function as the trial function. Our results are systematically compared with experimental data and other theoretical findings available in the literature.

## I. INTRODUCTION

Quantum chromodynamics (QCD) is the fundamental theory of strong interaction that describes the dynamics of quarks and gluons. These form hadrons such as protons, neutrons, and mesons. Based on the  $SU(3)_C$  gauge symmetry, QCD introduces the concept of “colour charge”, namely red, green, and blue, as the source of strong interactions [1]. Unlike quantum electrodynamics (QED), where photons do not interact with each other, QCD's gluons, the mediators of the strong force, carry colour charge and thus engage in self-interactions, adding complexity to the theory. The two fundamental aspects of QCD are -(1)Perturbative,(2)Non-perturbative [2]. While perturbative approach deals with processes involving high momentum transfer[3] like deep inelastic scattering(DIS)[4] and hard scatterings at LHC[5], the non-perturbative approach(NPQCD) deals with low momentum transfer processes[3] like hadron masses, decay constants[6] and form factor of hadrons. The most widely popular approach in NPQCD is lattice QCD. A less ambitious approach is the analytical study of the NPQCD with potential models where the known property of hadron-like confinement is imposed through a suitable confinement parameter,  $b$ .

The most suitable confinement parameter,  $b$ , was introduced in 1975 when De Rujula, Georgi, and Glashow [7] applied an effective potential of Quantum Electrodynamics (QED) to quark physics. It is worth noting that the potential is a concept from non-relativistic quantum mechanics, not from relativistic quantum field theory, where interactions are visualized as arising from the exchange of quanta. However, for slowly moving particles, it corresponds to the three-dimensional Fourier

transform of the lowest-order covariant matrix element. On the other hand, heavy-flavored mesons contain heavy quarks such as charm ( $c$ ) or bottom ( $b$ ) quarks, and their structure is analogous to that of the hydrogen atom, although the strong interaction governs the interaction force. The mass of the heavy quark in heavy-flavored mesons effectively dominates its momentum and behaves almost like a static source of the strong force, interacting with the light quarks and gluons within the bound state. Hence, non-relativistic frameworks, such as potential models[8], are applicable for studying the static and dynamic properties of heavy-flavored mesons. Despite some limitations[9][10], the potential model[11][12] in Quantum Chromodynamics (QCD) has been quite successful in explaining various static and dynamic properties of heavy-flavored mesons. The most widely used potentials in QCD are:

### 1. Cornell Potential[13][14]

$$V(r) = -\frac{4\alpha_s}{r} + br$$

A combination of a Coulomb-like term and a linear confining term, commonly used in quarkonium models.

### 2. Power Law Potential[15][16]:

$$V(r) = \frac{-a}{r} + br^n$$

A general potential form where the interaction strength varies with distance raised to power  $n$ .

### 3. Martin Potential[17]:

$$V(r) = br^{0.1} + c$$

A phenomenological potential with a very weak power dependence used in hadronic spectroscopy.

---

\* Potential model formalism (Killingbeck Potential)

<sup>†</sup> Also at Department of Physics, Tezpur University.;  
php24117@tezu.ac.in

<sup>‡</sup> php24102@tezu.ac.in

<sup>§</sup> shriyan@tezu.ernet.in

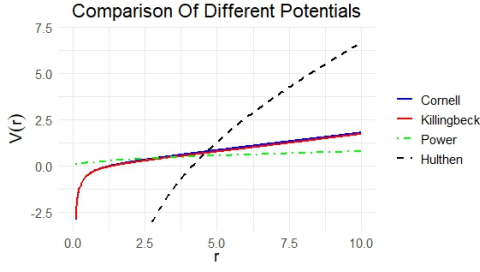

FIG. 1. Comparison of different potentials.

#### 4. Killingbeck Potential[18]:

$$V(r) = ar^2 + br + \frac{c}{r}$$

A hybrid potential combining harmonic, linear, and Coulomb-like terms used in atomic and nuclear models.

#### 5. Logarithmic Potential[9]:

$$V(r) = a \ln(r)$$

The potential is used to model the confinement property[19], where the force increases slowly with distance, and the Coulomb-like short-range interaction between the quarks.

#### 6. Hulthén Potential[9]:

$$V(r) = -V_0 \frac{e^{-\alpha r}}{1 - e^{-\alpha r}}$$

A short-range potential resembling the Coulomb potential at small  $r$ , but decaying exponentially at large distances. It is used in nuclear and particle physics to describe screening effects and bound states in mesons.

While the Cornell potential[13] and power law potential[15] have been widely explored in Quantum Chromodynamics, the other ones have not. In this work, specifically, we consider the Killingbeck potential(2) to study several static and dynamic properties of heavy-flavor mesons. The potential contains harmonic ( $ar^2$ ), linear ( $br$ ), and Coulomb terms[18][20], which defines linear confinement at larger distance [19][21] (specifically the terms  $ar^2 + br$ ) and Coulomb-like short ranged interaction between quarks ( $\frac{c}{r}$ ). This potential is effective in studying quarkonium system[22], calculating properties like Isgur-wise function, which describes the semileptonic heavy meson decays[20].

The Schrodinger equation with the Killingbeck potential is not exactly solvable. Hence, we have to look for available approximation methods in Quantum mechanics. The most widely used approximation methods in quantum mechanics are:

- Perturbation Theory[23][24][25]
- The Variational method[26][27]
- WKB approximation method[28]

The application of the variational method in the approach of the QCD potential model is not new, dating back to 1996 [29], when Hwang et al. [29] used it with a linear plus Coulomb Cornell potential to estimate the masses and decay constants of heavy-flavor mesons. Later, in [16], Rai et al. used it with a power law potential, and in [30], Vega and Flores used it with a supersymmetric potential. Inspired by this and keeping in mind the success of the Killingbeck potential in determining the static and dynamic properties of heavy-flavor mesons[20][31], we applied the variational method, considering the Coulomb wave function (1) as the trial wave function. The Coulomb wave function was chosen because of the static nature of heavy quarks in heavy mesons, which makes the system analogous to that of the hydrogen atom.

In section 2 we provide the formalism where we used the variational method with a Coulombic trial wave-function. In section 3 we provide the results obtained with this formalism on masses, decay constants, and oscillation frequencies of neutral mesons. Detailed comparison is done with available experimental data as well as with other models such as QCD Sum rules[32], Lattice QCD[33], and Relatively Harmonic Confinement Model(RHCM)[34]. In section 4, we summarize the conclusion.

## II. FORMALISM

### A. Variational Method

We consider a Coulombic trial wave-function as,

$$\psi(r) = \frac{(\mu\alpha)^{3/2}}{\sqrt{\pi}} e^{-\mu\alpha r} \quad (1)$$

where  $\mu$  is the reduced mass of the quark-antiquark pairs, and  $\alpha$  is the variational parameter. The interaction potential used is the Killingbeck potential[18], which is given by:

$$V(r) = ar^2 + br + \frac{c}{r}, \quad (2)$$

where  $a$ ,  $b$ , and  $c$  are potential parameters. In this work, we adopt the values  $a = 0.00193235$ ,  $b = 0.15743235$ , and  $c = -0.288421$  [20].

Now, the Hamiltonian of the  $Q\bar{q}$  bound state of a heavy-flavor meson is given by:

$$\hat{H} = -\frac{1}{2\mu} \left[ \frac{\partial^2}{\partial r^2} + \frac{2}{r} \frac{\partial}{\partial r} \right] + V(r) \quad (3)$$

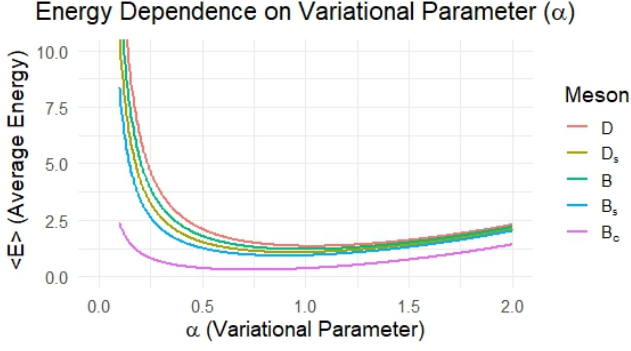

FIG. 2. Plot of average energy vs variational parameter ( $\alpha$ )

Following the variational scheme, the ground state energy is:

$$\langle E \rangle = \langle \psi | \hat{H} | \psi \rangle \quad (4)$$

Now from Equation (2), we have:

$$\frac{\partial \psi}{\partial r} = -\alpha \mu \psi, \quad \frac{\partial^2 \psi}{\partial r^2} = \alpha^2 \mu^2 \psi \quad (5)$$

Hence,

$$\langle \psi | \hat{H} | \psi \rangle = \langle E \rangle = \frac{1}{2} \mu \alpha^2 + c \mu \alpha + \frac{3b}{2\mu\alpha} + \frac{3a}{\mu^2 \alpha^2} \quad (6)$$

Now, minimizing the energy, we can find the variational parameter for different heavy flavored mesons,

$$\frac{\partial \langle E \rangle}{\partial \alpha} = \mu \alpha - \frac{6a}{\mu^2 \alpha^3} - \frac{3b}{2\mu \alpha^2} + c \mu = 0 \quad (7)$$

And we get,

$$\mu \alpha - \frac{6a}{\mu^2 \alpha^3} - \frac{3b}{2\mu \alpha^2} + c \mu = 0 \quad (8)$$

Solving this equation in Mathematica 9, we get the variational parameter for different mesons, which is shown in Table(1) in the result section.

### B. Masses of Heavy Flavored Mesons:

The mass formula for pseudo-scalar mesons is given by [31][35][20]:

$$M_p = M_Q + M_{\bar{Q}} + \langle E \rangle + \langle H_{ss} \rangle \quad (9)$$

where  $M_p$  is the mass of the pseudo-scalar meson,  $M_Q$  and  $M_{\bar{Q}}$  are the masses of the constituent quark and anti-quark respectively,  $\langle E \rangle$  is the ground-state energy of the system, and  $\langle H_{ss} \rangle$  is the energy shift due to mass splitting

from spin interaction in perturbation theory, which is given by [36][31][10]:

$$\langle H_{ss} \rangle = \frac{32\pi\alpha_s}{9M_Q M_{\bar{Q}}} (\vec{S}_Q \cdot \vec{S}_{\bar{Q}}) |\psi(0)|^2 \quad (10)$$

Now, for pseudo-scalar mesons, the spin-spin interaction term becomes [31]:

$$\vec{S}_Q \cdot \vec{S}_{\bar{Q}} = -\frac{3}{4}$$

and so the mass formula becomes [37],[31]

$$M_p = M_Q + M_{\bar{Q}} + \langle E \rangle - \frac{8\pi\alpha_s}{3M_Q M_{\bar{Q}}} |\psi(0)|^2 \quad (11)$$

### C. Decay Constant

Charged mesons can decay to a lepton-neutrino pair through annihilation via a virtual  $W^\pm$  boson. The weak decays of mesons can be classified into three categories as: Leptonic decay [38], semi-leptonic decay [39], and non-leptonic decay [40] according to the final products of the decay. Among these, leptonic decays are rarer but have a clear experimental signature because of the presence of a highly energetic lepton in the final state [39], where a charged lepton ( $l = e, \mu, \tau$ ) and its corresponding neutrino ( $\nu$ ) are created. Leptonic decays are characterized by a parameter called the decay constant, which physically describes the wave-function overlap of the quark and anti-quark. This is an important parameter to estimate the Cabibbo-Kobayashi-Maskawa (CKM) matrix elements [41], where the rate of decay depends on. According to the Van-Royen-Weisskopf formula [42][37][31], the decay constant of a pseudo-scalar meson is related to the wave-function at the origin as [35][31][36][37]

$$f_P (|\psi(0)|^2, M_p) = \sqrt{\frac{12 |\psi(0)|^2}{M_p}} \quad (12)$$

Now introducing the QCD correction term [31][36] it becomes,

$$f_P = \sqrt{\frac{12 |\psi(0)|^2}{M_p}} \bar{C}^2 \quad (13)$$

where,

$$\bar{C}^2 = \sqrt{1 - \frac{\alpha_s}{\pi} \left[ 2 - \frac{M_Q - M_q}{M_Q + M_q} \ln \left( \frac{M_Q}{M_{\bar{Q}}} \right) \right]} \quad (14)$$

### D. Oscillation Frequency

Neutral mesons,  $B_D$  and  $B_S$  exhibit the property of particle-antiparticle mixing[37][43][44] where particles make transitions into their antiparticle states and vice versa. The transitions  $B_q^0 \leftrightarrow \bar{B}_q^0$  are due to the weak interaction. [37][31] and caused due to the difference between their weak and mass eigenstates. This causes them to oscillate between these states[44][37], and it is characterised by a mixing mass parameter,  $\Delta M_B$ , known as their frequency of oscillation[37][44][31].

$$\Delta m_B = \frac{G_F^2 m_t^2 M_{B_q} f_{B_q}^2}{8\pi} g(x_t) \eta_t |V_{tq} V_{tb}|^2, \quad (15)$$

and,

$$q = d, s \quad (16)$$

Where,

$$g(x_t) = \frac{1}{4} + \frac{9}{4(1-x_t)} - \frac{3}{2(1-x_t)^2} - \frac{3x_t^2}{2(1-x_t)^3}$$

Here,  $G_F$  is the Fermi constant,  $m_t$  is the top quark mass,  $M_{B_q}$  and  $f_{B_q}$  are the mass and decay constant of the  $B_q$  meson,  $g(x_t)$  is a loop function with  $x_t = \frac{m_t^2}{M_W^2}$ ,  $\eta_t$  is a QCD correction factor, and  $V_{tq}, V_{tb}$  are CKM matrix elements.

## III. RESULTS

### A. Mass

As given in the formalism section, meson masses are calculated using the mass relation equation(11), where,  $M_Q, M_{\bar{Q}}, \langle E_{GS} \rangle$  and  $\langle H_{SS} \rangle$  are taken as input parameters, and listed in Table II. The values of the variational parameter and reduced mass are listed in Table I. The quark masses are taken from [35], where the masses of the down ( $M_d$ ), charm ( $M_c$ ), strange ( $M_s$ ), and bottom ( $M_b$ ) quarks are assumed to be 0.336, 1.550, 0.483, and 4.950 GeV, respectively. The coupling constant  $\alpha_s$  in the expression for  $\langle H_{SS} \rangle$  is taken to be 0.39 and 0.23 for the charmonium and bottomonium ranges, respectively[45].

The calculated meson masses are compared with the experimental values [35], as well as with theoretical predictions from other models such as QCD sum rules, lattice QCD, and RHCM models [35]. Figure (3) is the scattered plot of our calculated values and theoretically predicted values from the mentioned model..

### B. Decay Constant

The corresponding values of the decay constant of mesons are listed in Table IV. It is calculated using (13), where our calculated meson masses, as input parameters, are taken from the table II. The correction factor  $\bar{C}$  is considered as 0.9[31]. Our calculated values of decay constants are listed in table IV. Also, the calculated values are compared with the experimental values as well as theoretical predicted values from QCD in table V.

The calculated meson masses are compared with the experimental values [35], as well as with theoretical predictions from other models such as QCD sum rules, lattice QCD, and RHCM models [35]. Figure (3) is the scattered plot of our calculated values and theoretically predicted values from the mentioned model.

### C. Oscillation Frequency

As explained in Section 2.4, the oscillation frequencies for  $B_D$  and  $B_S$  mesons are calculated using Equations (16) and (17). The other parameters involved in these expressions include  $m_t = 174$  GeV,  $m_W = 80.403$  GeV, and the elements of the CKM matrix:  $|V_{td}| = 0.0074$ ,  $|V_{ts}| = 0.004$ , and  $|V_{tb}| = 1$ . The QCD correction factor  $\eta_t$  is taken as 0.55[46]. Our calculated values and the comparison of these values with the experimental values and theoretically predicted values of the model mentioned in table VI.

TABLE I. Reduced masses and variational parameters for different mesons.

| Meson           | Reduced Mass (GeV) | $\alpha$ |
|-----------------|--------------------|----------|
| $D(c\bar{d})$   | 0.2761             | 1.6119   |
| $D_S(c\bar{s})$ | 0.3682             | 1.3495   |
| $B(b\bar{d})$   | 0.3180             | 1.4754   |
| $B_S(b\bar{s})$ | 0.4400             | 1.2055   |
| $B_C(b\bar{c})$ | 1.1803             | 0.6787   |

TABLE II. Meson properties with mesons as rows and parameters as columns.

|                 | $M_Q$<br>(in GeV) | $M_{\bar{Q}}$<br>(in GeV) | $\langle E \rangle_{\text{GS}}$<br>(in GeV) | $ \psi(0) ^2$<br>(in GeV <sup>3</sup> ) | $\langle H_{SS} \rangle$<br>(in GeV) | Calculated Mass<br>(in GeV) | Experimental Mass<br>(in GeV) |
|-----------------|-------------------|---------------------------|---------------------------------------------|-----------------------------------------|--------------------------------------|-----------------------------|-------------------------------|
| $D(cd)$         | 1.550             | 0.336                     | 0.790                                       | 0.0280                                  | 0.3152                               | 2.360                       | $1.869 \pm 0.0016$            |
| $D_S(c\bar{s})$ | 1.550             | 0.483                     | 0.693                                       | 0.0390                                  | 0.3055                               | 2.420                       | $1.968 \pm 0.0033$            |
| $B(b\bar{d})$   | 4.950             | 0.336                     | 0.742                                       | 0.0328                                  | 0.1168                               | 5.861                       | $5.279 \pm 0.0017$            |
| $B_S(b\bar{s})$ | 4.950             | 0.483                     | 0.622                                       | 0.0457                                  | 0.1177                               | 5.867                       | $5.366 \pm 0.0024$            |
| $B_C(b\bar{c})$ | 4.950             | 1.550                     | 0.344                                       | 0.1634                                  | 0.1263                               | 6.667                       | $6.277 \pm 0.0060$            |

TABLE III. Comparison of calculated meson masses with QCD sum rules, lattice QCD, and RHCM model (in GeV).

|                 | Calculated<br>Mass (in GeV) | QCD Sum<br>Rules (in GeV) | Lattice<br>QCD (in GeV) | RHCM<br>Model (in GeV) |
|-----------------|-----------------------------|---------------------------|-------------------------|------------------------|
| $D(cd)$         | 2.360                       | 1.870                     | 1.885                   | 2.653                  |
| $D_S(c\bar{s})$ | 2.420                       | 1.970                     | 1.969                   | 2.778                  |
| $B(b\bar{d})$   | 5.861                       | 5.280                     | 5.283                   | 6.192                  |
| $B_S(b\bar{s})$ | 5.867                       | 5.370                     | 5.366                   | 6.264                  |
| $B_C(b\bar{c})$ | 6.667                       | —                         | 6.278                   | 6.929                  |

TABLE IV. Calculated meson masses and decay constants with and without correction factors, compared to experimental values (all in GeV).

|       | Calculated<br>Mass $M_P$ (in GeV) | $f_P$ (Without<br>Correction) (in GeV) | $f_P$ (With<br>Correction) (in GeV) | Experimental<br>$f_P$ (in GeV) |
|-------|-----------------------------------|----------------------------------------|-------------------------------------|--------------------------------|
| $D$   | 2.360                             | 0.380                                  | 0.342                               | $0.205 \pm 0.085 \pm 0.025$    |
| $D_S$ | 2.420                             | 0.487                                  | 0.490                               | $0.254 \pm 0.059$              |
| $B_U$ | 5.861                             | 0.259                                  | 0.233                               | $0.198 \pm 0.014$              |
| $B_S$ | 5.867                             | 0.311                                  | 0.280                               | $0.237 \pm 0.017$              |
| $B_C$ | 6.667                             | 0.546                                  | 0.492                               | 0.562                          |

TABLE V. Comparison of calculated decay constants ( $f_P$ ) with QCD sum rule, lattice QCD, and RHCM model (all in GeV).

|       | Calculated<br>$f_P$ (in GeV) | Lattice QCD<br>(in GeV) | QCD Sum Rule<br>(in GeV) | RHCM Model<br>(in GeV) |
|-------|------------------------------|-------------------------|--------------------------|------------------------|
| $D$   | 0.342                        | $0.220 \pm 0.003$       | $0.206 \pm 0.002$        | 0.336                  |
| $D_S$ | 0.439                        | $0.258 \pm 0.001$       | $0.245 \pm 0.015$        | 0.387                  |
| $B_U$ | 0.233                        | $0.218 \pm 0.005$       | $0.193 \pm 0.012$        | 0.581                  |
| $B_S$ | 0.280                        | $0.228 \pm 0.010$       | $0.232 \pm 0.018$        | 0.600                  |
| $B_C$ | 0.492                        | —                       | —                        | 0.607                  |

TABLE VI. Oscillation frequencies  $\Delta m_B$  for  $B_D$  and  $B_S$  mesons from different approaches (all values in  $\text{ps}^{-1}$ ).

|                         | $B_D$<br>( $\text{ps}^{-1}$ ) | $B_S$<br>( $\text{ps}^{-1}$ ) |
|-------------------------|-------------------------------|-------------------------------|
| Calculated $\Delta m_B$ | 0.39                          | 17.1                          |
| QCD Sum Rules           | 0.48                          | 14.6                          |
| Lattice QCD             | 0.63                          | 19.6                          |
| Experimental            | 0.50                          | 17.76                         |

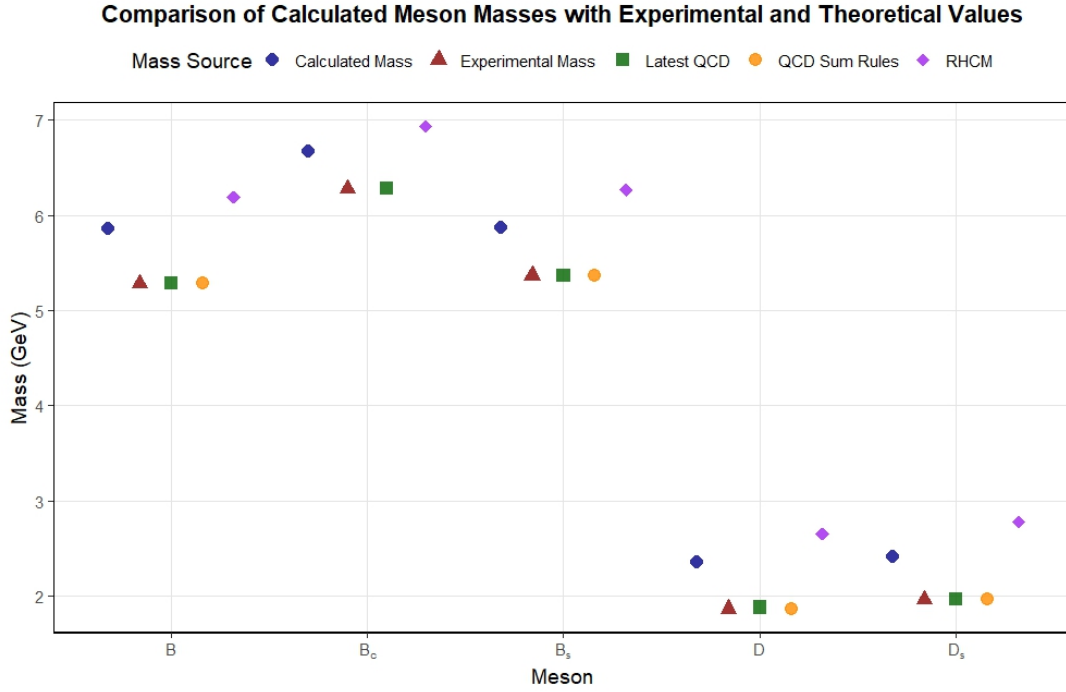

FIG. 3. Comparison of meson masses across different models.

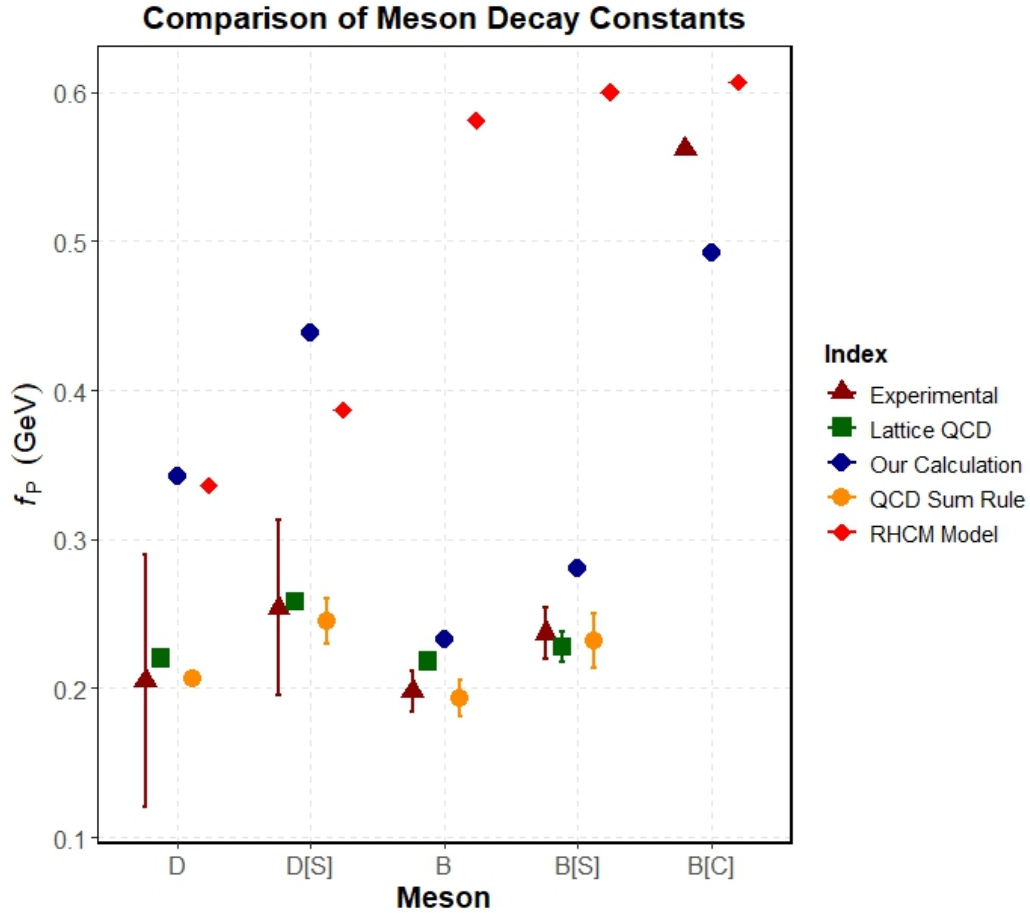

FIG. 4. Comparison of calculated decay constant ( $f_P$ ) with QCD sum rule, lattice QCD, and RHCM model

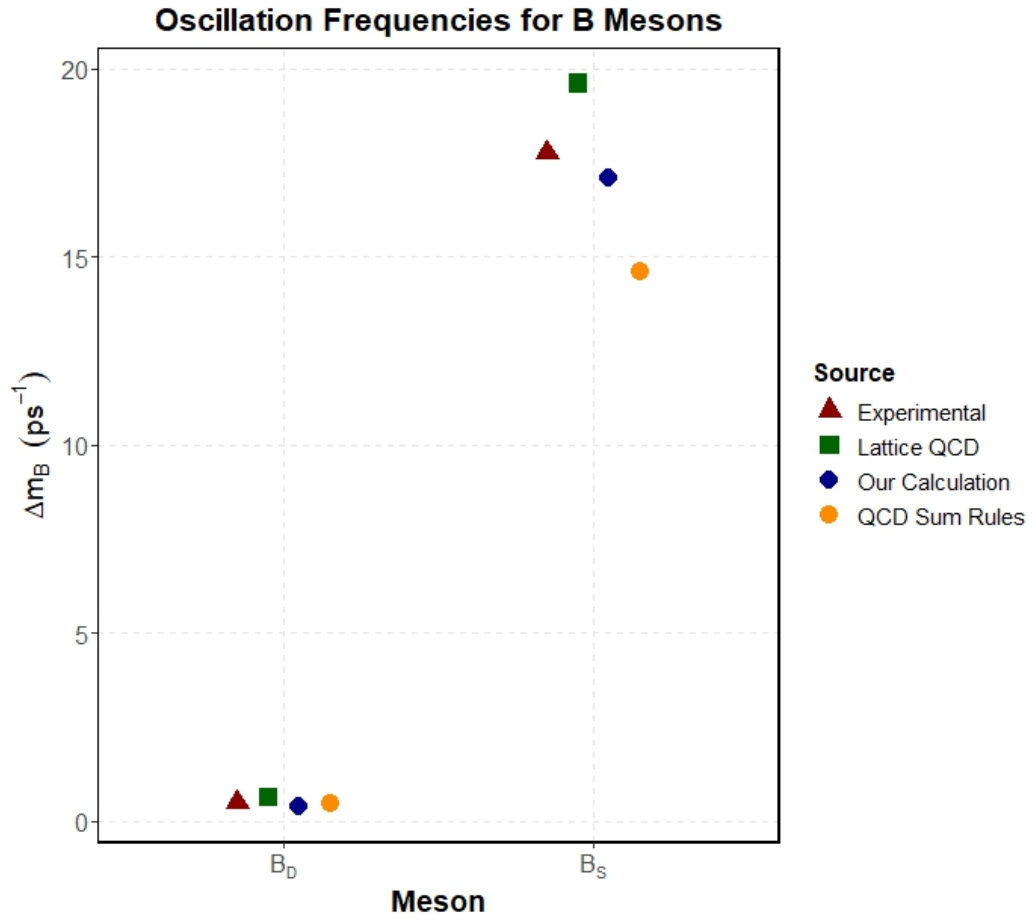

FIG. 5. Oscillation frequencies for different meson states.



#### IV. CONCLUSION

In this paper, we have employed the quantum mechanical variational method with the Killingbeck potential to study several properties of heavy-flavored mesons. Dealing with a variational scheme is quite a challenge, because there is no rule for the choice of a trial wave-function with the unknown parameters, which is later optimized to estimate different properties. But following the recent works with the power law potential[16], Cornell potential[13] where it has been established that a Gaussian trial wave function is a good choice to study heavy-flavoured mesons. Although the linear plus Coulomb Cornell potential is explored quite elaborately to study static and dynamic properties of these mesons, there is no such development on the Killingbeck potential[18]. However, with the Killingbeck potential, the Coulombic trial wave function shows improvement in results, and the Coulombic wave function is physically more appealing too. Therefore, in this work, specifically, we adopted the Coulomb trial wave function and estimated masses, decay constants, and oscillation frequencies of a few heavy-flavoured mesons. The output results of the formalism substantially agree with available experimental data, as well as with the results of the RHCM model[], lattice

QCD[], and QCD sum rules[]. It is an improvement over the previous perturbative approach, where an arbitrary choice between the linear and Coulomb part of the potential to consider as parent/perturbed term is necessary. The results for  $B$  mesons obtained are in excellent agreement with experimental data and with those of lattice QCD and QCD sum rule. Further, our results are in good harmony with some of the previous works. The success of the present formalism motivates its application to study other properties of heavy-flavoured mesons, such as Isgur-Wise function, leptonic decay width, Branching ratio, CKM matrix elements etc.

However, one limitation is that the results obtained are sensitive to the chosen trial wave function, so it is very crucial to choose a proper trial wave function for the  $Q\bar{Q}$  system. Also, small inconsistencies in our results in the case of  $D$ ,  $D_S$  mesons, where one quark/antiquark is light, reasonably indicate some relativistic correction is needed. Although in spite of such limitations, this model provides a simple way to investigate static and dynamic properties of heavy-flavoured mesons, at least as far as phenomenology is concerned.

#### V. BIBLIOGRAPHY

- 
- [1] M. Baker, P. Cea, V. Chelnokov, L. Cosmai, F. Cuteri, and A. Papa, The confining color field in  $su(3)$  gauge theory, *Eur. Phys. J. C* **80**, 514 (2020).
  - [2] B. L. Ioffe, V. S. Fadin, and L. N. Lipatov, *Quantum Chromodynamics: Perturbative and Nonperturbative Aspects* (Cambridge University Press, 2010) hardback ISBN: 9780521631488, £110.00 (180); *E – book ISBN* : 9780511717444, 144.
  - [3] A. Deur, S. J. Brodsky, and G. F. de Téramond, On the interface between perturbative and nonperturbative qcd, *Progress in Particle and Nuclear Physics* **90**, 1 (2016), thomas Jefferson National Accelerator Facility, SLAC National Accelerator Laboratory, Universidad de Costa Rica.
  - [4] J. Bartels and M. Wüsthoff, A perturbative approach to diffractive deep-inelastic scattering, *Journal of Physics G: Nuclear and Particle Physics* **22**, 929 (1996).
  - [5] C. T. Sachrajda, Perturbative qcd and hard scattering processes, *Physica Scripta* **19**, 85 (1979).
  - [6] F. Bernardoni, B. Blossier, J. Bulava, M. D. Morte, P. Fritzsche, N. Garron, A. Gérardin, J. Heitger, G. von Hippel, H. Simma, and R. Sommer (ALPHA Collaboration), Decay constants of b-mesons from non-perturbative hqet with two light dynamical quarks, *Physics Letters B* **735**, 349 (2014), nIC @ DESY, LPT Orsay, Trinity College Dublin, CP3-Origins, IFIC Valencia, Humboldt-Univ. Berlin, Univ. Münster, Univ. Mainz.
  - [7] A. De Rújula, H. Georgi, and S. L. Glashow, Hadron masses in a gauge theory, *Phys. Rev. D* **12**, 147 (1975).
  - [8] W. Lucha and F. F. Schoeberl, Phenomenological aspects of nonrelativistic potential models, *Physics Reports* **200**, 127 (1991).
  - [9] S. M and A. Ranjan, Models and potentials in hadron spectroscopy, *Journal of Physics G: Nuclear and Particle Physics* **50**, 073001 (2023).
  - [10] K. K. Pathak, S. Bhattacharya, and T. Das, Parameterisation space for cornell potential in a qcd potential model, *The European Physical Journal C* **82**, 1081 (2022).
  - [11] W. Lucha and F. F. Schöberl, *Effective Potential Models for Hadrons*, Tech. Rep. HEPHY-PUB 621/95, UWThPh-1995-16 (Institut für Hochenergiephysik, Österreichische Akademie der Wissenschaften and Institut für Theoretische Physik, Universität Wien, 1995) preprint.
  - [12] E. Eichten, S. Godfrey, H. Mahlke, and J. L. Rosner, Quarkonia and their transitions, arXiv preprint (2008), fermilab, Carleton University, Cornell University, University of Chicago, hep-ph/0701208v3.
  - [13] A. A. Alkathiri, L. S. El-Sherif, A. M. Bakry, A. Ismail, and M. Allosh, Puzzle of the cornell potential on the heavy and heavy-light meson spectra, *Physica Scripta* **99**, 105305 (2024).
  - [14] A. Vega and J. Flores, Heavy quarkonium properties from cornell potential using variational method and supersymmetric quantum mechanics, *Pramana – Journal of Physics* **87**, 73 (2016).
  - [15] M. R. Arafah and Fayyazuddin, Power law potential and quarkonium, *Annals of Physics* **220**, 55 (1992).
  - [16] A. K. Rai, R. H. Parmar, and P. C. Vinodkumar, Masses and decay constants of heavy–light flavour mesons in a variational scheme, *Journal of Physics G: Nuclear and*

- Particle Physics **28**, 2275 (2002).
- [17] M. Shah, B. Patel, and P. C. Vinodkumar, D meson spectroscopy and their decay properties using martin potential in a relativistic dirac formalism, The European Physical Journal C **76**, 10.1140/epjc/s10052-016-3875-5 (2016).
  - [18] J. Killingbeck, Power series solutions of schrödinger's equation, Physics Letters A **65**, 874 (1978).
  - [19] N. Nakanishi and I. Ojima, Color confinement in quantum chromodynamics, Progress of Theoretical Physics **71**, 1359 (1984).
  - [20] S. Rahmani, H. Hassanabadi, and S. Zarrinkamar, Isgur-wise function parameters and meson masses with the schrödinger equation, Physica Scripta **89**, 065301 (2014).
  - [21] D. Šijački, Quark confinement and the short-range component of general affine gauge gravity, Physics Letters B **109**, 435 (1982).
  - [22] C. Quigg and J. L. Rosner, Quantum mechanics with applications to quarkonium, Physics Reports **56**, 167 (1979).
  - [23] N. Brambilla, J. Ghiglieri, and A. Vairo, Three-quark static potential in perturbation theory, Physical Review D **81**, 054031 (2010).
  - [24] N. Fillion and R. M. Corless, Perturbation theory, arXiv preprint arXiv:2212.07380 (2022).
  - [25] D. K. Choudhury and K. K. Pathak, Comments on the perturbation of cornell potential in a qcd potential model, Journal of Physics: Conference Series **481**, 012022 (2014).
  - [26] R. Borghi, The variational method in quantum mechanics: an elementary introduction, European Journal of Physics **39**, 035410 (2018).
  - [27] C. Radhakrishnan, Prediction of mass of  $\eta_c(2s)$  using variational method, arXiv preprint arXiv:2103.03172 (2021).
  - [28] B. J. Hazarika and D. K. Choudhury, Isgur-wise function in a qcd-inspired potential model with wkb approximation, Pramana – Journal of Physics **88**, 56 (2017).
  - [29] D. S. Hwang, C. S. Kim, and W. Namgung, Average kinetic energy of a heavy quark in semileptonic b decay, Physical Review D **54**, 5620 (1996).
  - [30] A. Vega and J. Flores, Heavy quarkonium properties from cornell potential using variational method and supersymmetric quantum mechanics, Pramana – Journal of Physics **87**, 73 (2016).
  - [31] J. Lahkar, R. Hoque, and D. K. Choudhury, Masses of heavy-light mesons with two-loop static potential in a variational approach, Modern Physics Letters A **34**, 1950106 (2019).
  - [32] P. Colangelo and A. Khodjamirian, Qcd sum rules, a modern perspective, arXiv preprint hep-ph/0010175 (2000).
  - [33] R. Gupta, Introduction to lattice qcd, arXiv preprint hep-lat/9807028 (1998).
  - [34] J. N. Pandya and P. C. Vinodkumar, Masses of s and p wave mesons and pseudoscalar decay constants using a confinement scheme, Pramana – Journal of Physics (2001), received 19 January 2001; revised 11 June 2001.
  - [35] R. Hoque, B. J. Hazarika, and D. K. Choudhury, 2s and 3s state masses and decay constants of heavy-flavour mesons in a non-relativistic qcd potential model with three-loop effects in v-scheme, The European Physical Journal C **80**, 1213 (2020).
  - [36] A. K. Rai, B. Patel, and P. C. Vinodkumar, Properties of  $q\bar{Q}$  mesons in non-relativistic qcd formalism, Physical Review C **78**, 055202 (2008).
  - [37] K. K. Pathak and D. K. Choudhury, Oscillation frequency of b and  $\bar{b}$  mesons in a qcd potential model with relativistic effect, Chinese Physics Letters **28**, 101201 (2011).
  - [38] K. Dash, P. C. Dash, R. N. Panda, S. Kar, and N. Barik, Purely leptonic decays of heavy-flavored charged mesons, Physical Review D **110**, 053004 (2024).
  - [39] L. Zhang, X.-W. Kang, X.-H. Guo, L.-Y. Dai, T. Luo, and C. Wang, A comprehensive study on the semileptonic decay of heavy flavor mesons, Journal of High Energy Physics **2021**, 179 (2021).
  - [40] M. Neubert and B. Stech, Non-leptonic weak decays of b mesons, in *Heavy Flavours II*, Advanced Series on Directions in High Energy Physics, Vol. 15, edited by A. Buras and M. Lindner (World Scientific, 1998) pp. 294–344.
  - [41] T. N. Pham, Ckm matrix elements (2011), arXiv:1110.6050 [hep-ph].
  - [42] D. S. Hwang and G.-H. Kim, Decay constant ratios  $f_{\eta_c}/f_{J/\psi}$  and  $f_{\eta_b}/f_{\Upsilon}$ , arXiv preprint hep-ph/9703364 (1997).
  - [43] W. Hulsbergen, Constraining new physics in  $b_s^0$  meson mixing, Modern Physics Letters A **28**, 1330023 (2013).
  - [44] J. Boucrot, Oscillations of neutral b meson systems, Nuclear Physics B - Proceedings Supplements **75**, 261 (1999).
  - [45] T. Das and D. K. Choudhury, Double heavy meson spectroscopy using potential models, International Journal of Modern Physics A **10.1142/S0217751X1650189X** (2016).
  - [46] B. Patel and P. C. Vinodkumar, Decay properties of d and  $\bar{d}$ s mesons in coulomb plus power potential (cppv), Chinese Physics C **34**, 1497 (2010).
